# Supplementary material for: Melatonin induces fat browning by transdifferentiation of white adipocytes andde novodifferentiation of mesenchymal stem cells
Source: Royal Society of Chemistry journal article supplement (doi:10.1039/d1fo04360a), 2022-01-01
Supplement: d1fo04360a1.pdf [file d1fo04360a1.pdf]

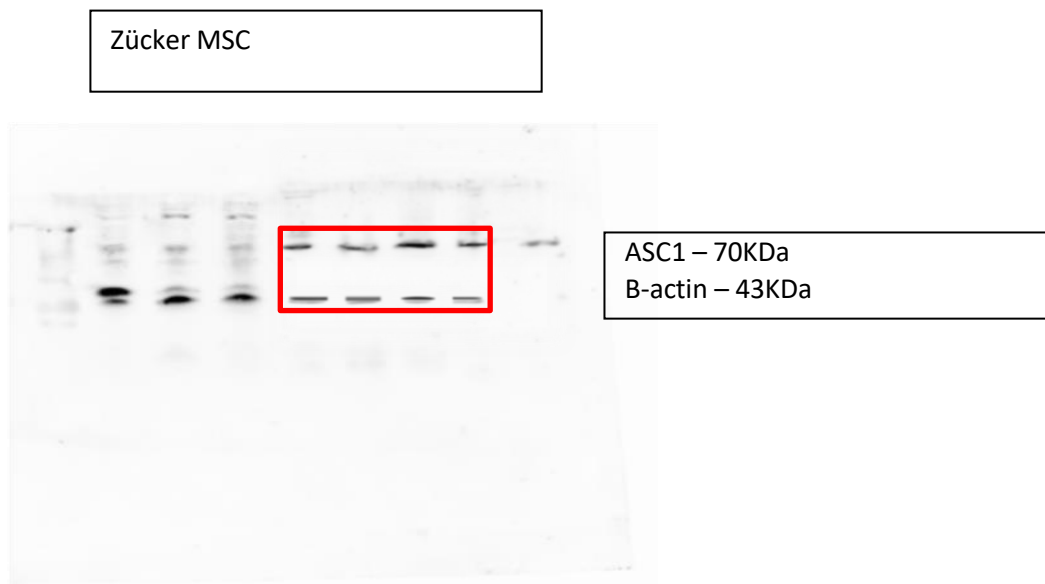

**Figure 2.** Effects of *in vivo* melatonin treatment on specific white adipocyte marker ASC-1 expression in inguinal adipose tissue from Zucker rats.

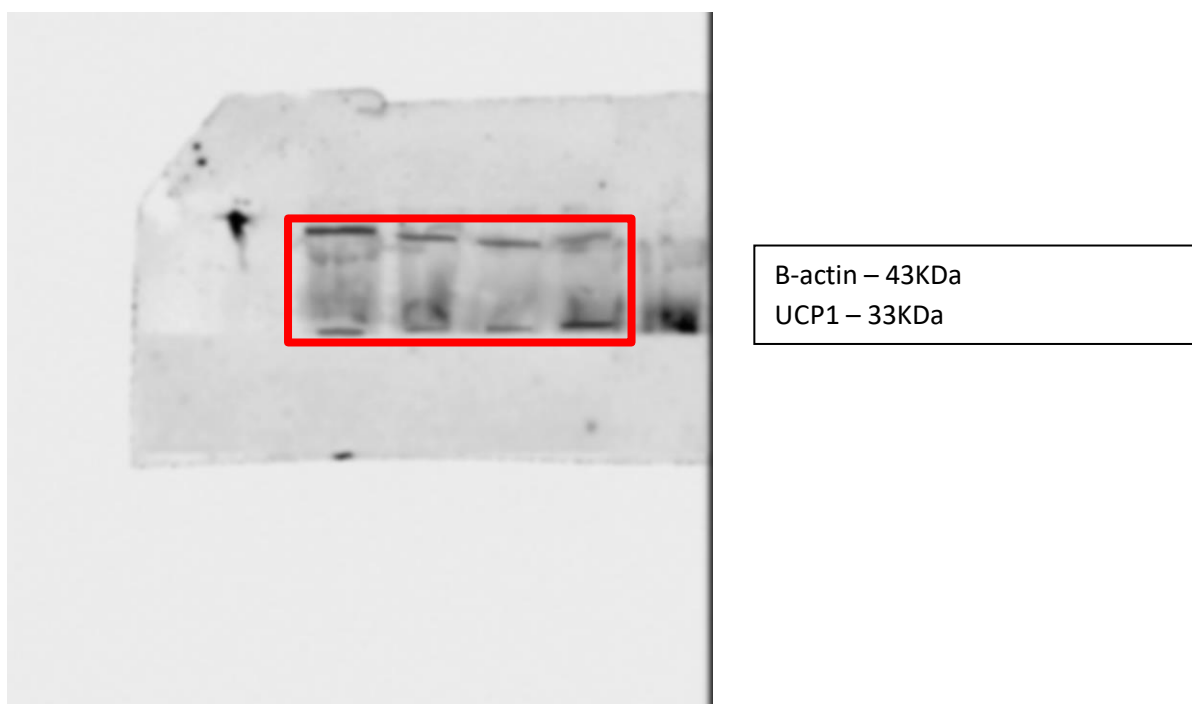

**Figure 3.** Effects of *in vivo* melatonin supplementation on thermogenic protein UCP1 expression in MSC of inguinal adipose tissue from Zucker rats. ZL, Zucker lean rats; ZDF, Zucker diabetic fatty rats; C, unsupplemented control; M, melatonin-supplemented. All values are expressed as mean  $\pm$  SEM of three independent experiments in duplicate. \*\* $P < 0.01$ ; \* $P < 0.05$ ; ## $P < 0.01$ .

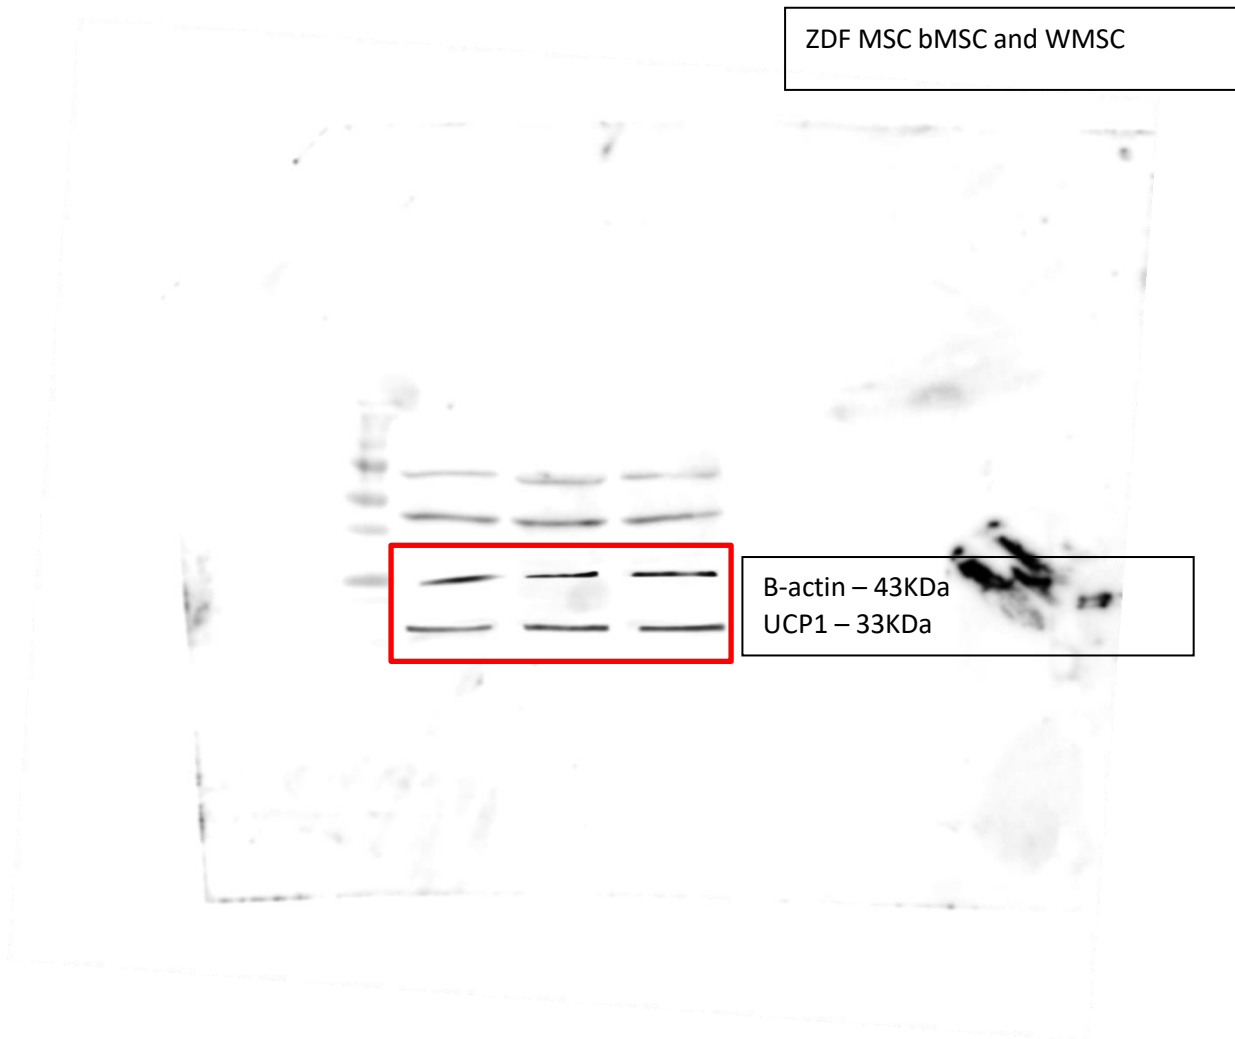

**Figure 7.** Effects of *in vitro* melatonin treatment on thermogenic protein UCP1 expression in differentiated adipocytes from MSC of inguinal adipose tissue from ZDF rats. MSC, mesenchymal stem cells; Adipocytes, differentiated adipocytes after 21 days; Adipocytes+MLT, differentiated adipocytes after 21 days incubated with melatonin. All values are expressed as mean  $\pm$  SEM of three independent experiments in duplicate. \* $P < 0.05$ .

**A**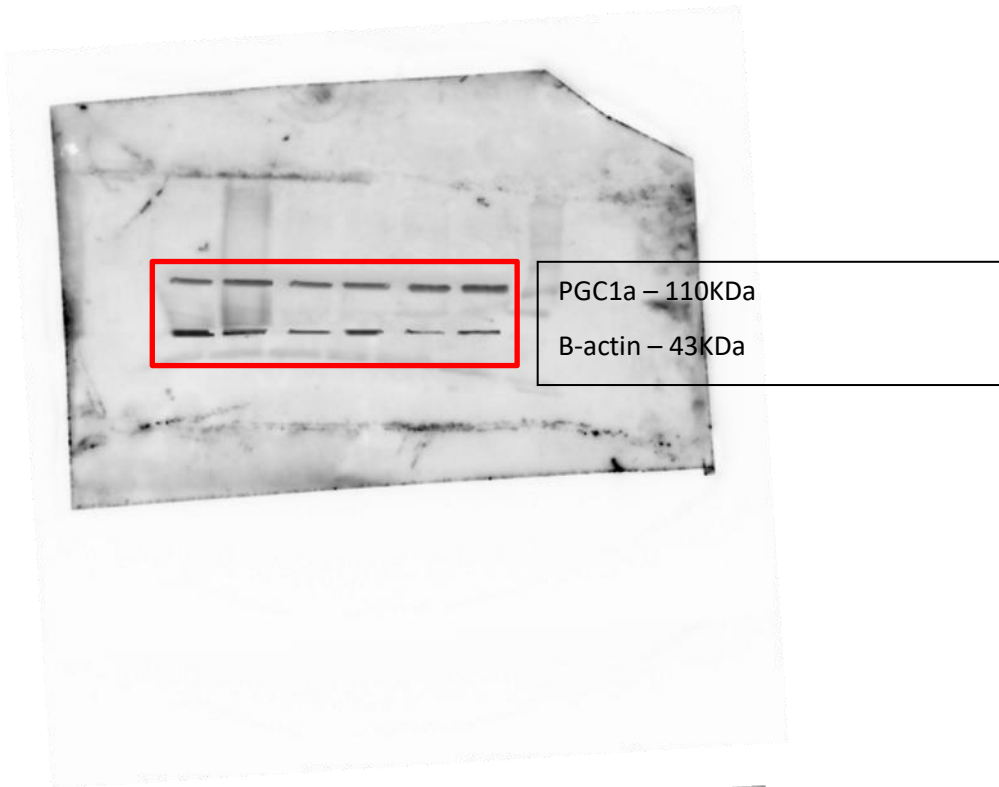**B**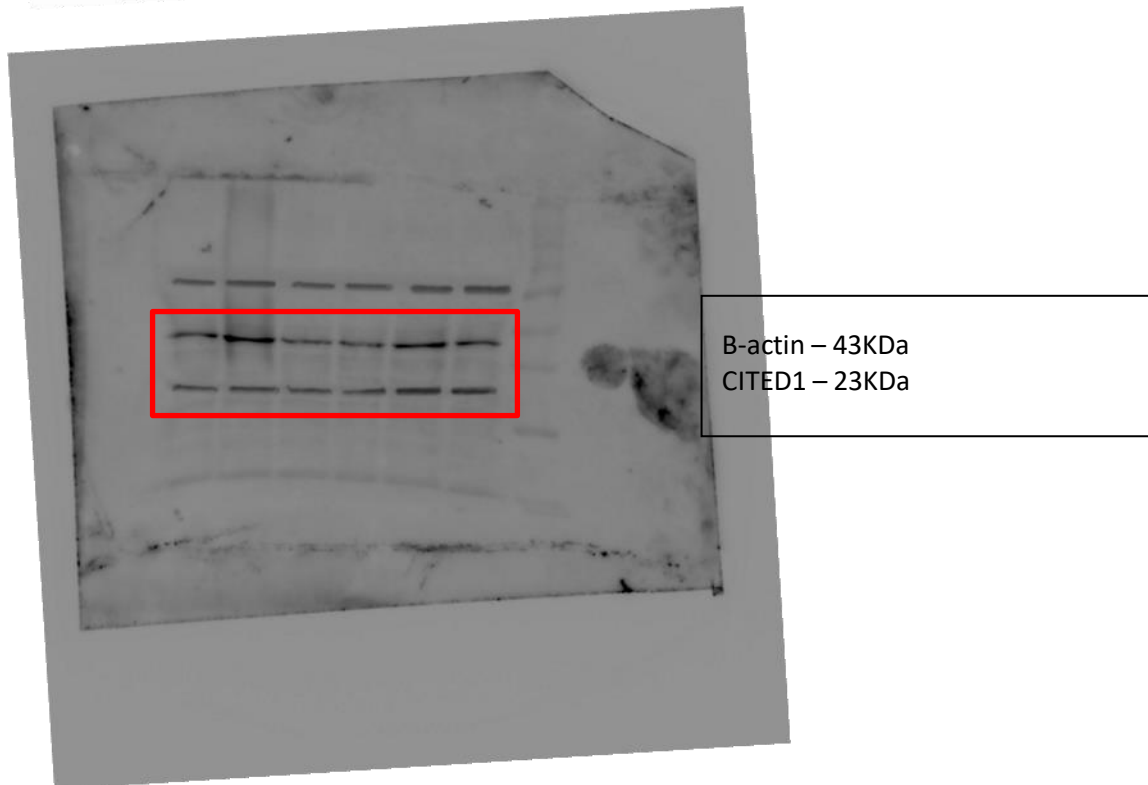

**Figure 8.** Effects of *in vitro* melatonin treatment on brown-like cell marker A) PGC1- $\alpha$  and B) CITED1 expression in differentiated adipocytes from WMSC and bMSC inguinal adipose tissue from ZDF rats. MSC, mesenchymal stem cells; Adipocytes, differentiated adipocytes after 21 days, Adipocytes+MLT, differentiated adipocytes after 21 days incubated with melatonin. All values are expressed as mean  $\pm$  SEM of three independent experiments in duplicate. \*\* $P < 0.01$ ; \* $P < 0.05$ .

Human MSC

**A**

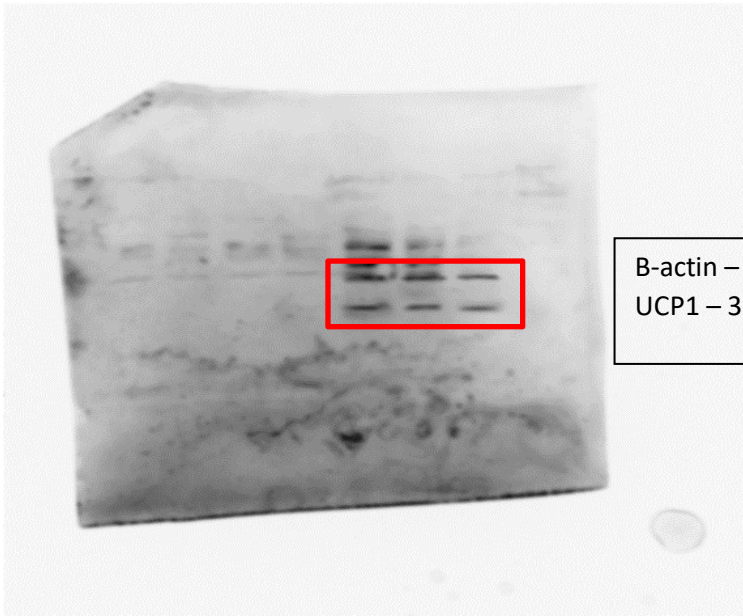

B-actin – 43KDa  
UCP1 – 33KDa

**B**

PGC1a – 110KDa  
B-actin – 43KDa

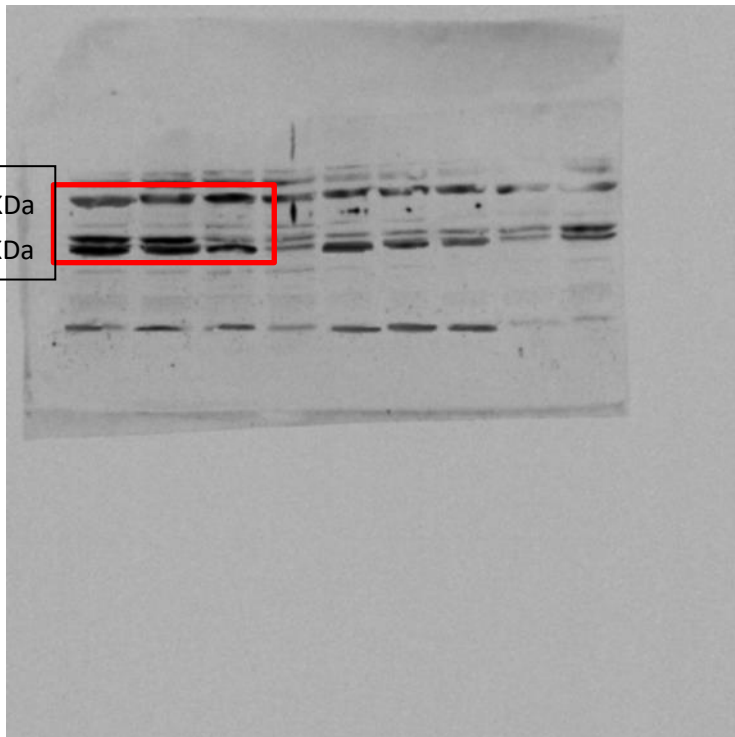

C

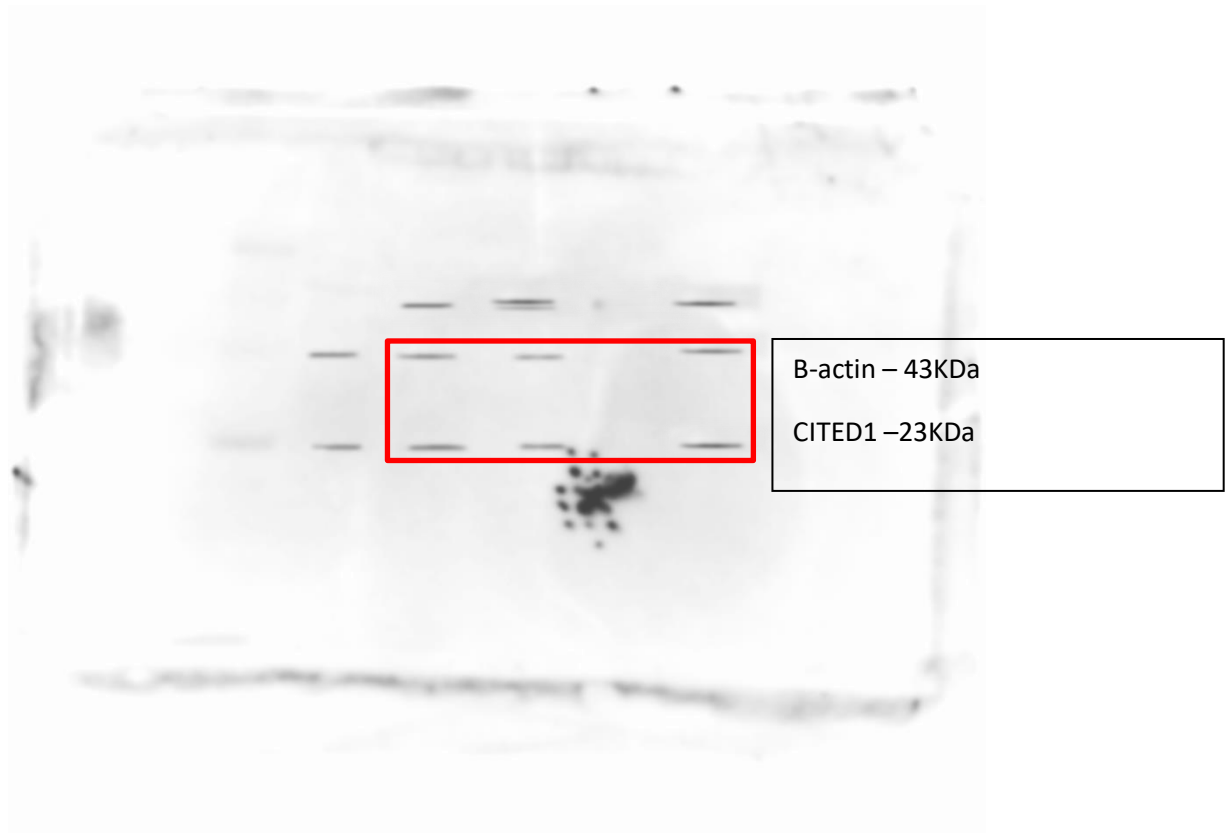

**Figure 9.** Effects of *in vitro* melatonin treatment on thermogenic protein A) UCP1, B) PGC1- $\alpha$  and C) brown-like cell marker CITED1 expression in differentiated adipocytes from hMSC isolated from lipoaspirates' adipose tissue. MSC, human mesenchymal stem cells; Adipocytes, differentiated adipocytes after 21 days; Adipocytes+MLT, differentiated adipocytes after 21 days incubated with melatonin. All values are expressed as mean  $\pm$  SEM of three independent experiments in duplicate. \*\* $P < 0.01$ ; \* $P < 0.05$ .
